# Supplementary material for: Pre-Exposure to Stress-Inducing Agents Increase the Anticancer Efficacy of Focused Ultrasound against Aggressive Prostate Cancer Cells
Source: Antioxidants (Basel). 2022 Feb 9;11(2):341. doi: 10.3390/antiox11020341 (PMC8868501; doi:10.3390/antiox11020341)
Supplement: Supplementary file 1 [file antioxidants-11-00341-s001.zip › antioxidants-1511494-supplementary.pdf]

## Supplementary Results

### *Standalone FUS Fails to Downregulate NF- $\kappa$ B and Akt in CRPC Cells*

According to western blot analysis, the C4-2B cells constitutively expressed NF- $\kappa$ B but not Akt (untreated control group, Fig. S1AC), while the more aggressive DU-145 cells expressed both of these transcription factors (Fig. S1BC). Furthermore, the DU-145 cells had significantly higher ( $p < 0.05$ ) expression of NF- $\kappa$ B ( $0.21 \pm 0.06$  per GAPDH) than the C4-2B cells ( $0.05 \pm 0.01$ ; Fig. S1C, left). Standalone FUS did not decrease the expression of NF- $\kappa$ B and Akt in the surviving C4-2B cells ( $0.96 \pm 0.30$  and  $1.1 \pm 0.93$  of the untreated control level; Fig. S1D, left) and had no effect on NF $\kappa$ B expression in the surviving DU-145 cells ( $1.1 \pm 0.28$ ). A significant ( $p < 0.001$ ) increase in Akt expression was observed in the DU-145 cells ( $3.4 \pm 0.52$ ).

The expression of phosphorylated (active) NF- $\kappa$ B was slightly stronger in the DU-145 cells than that in the C4-2B cells ( $0.17 \pm 0.03$  vs.  $0.14 \pm 0.05$ ; Fig. S1C, right). Standalone FUS at level H4 did not diminish NF- $\kappa$ B signaling in the DU-145 cells ( $1.0 \pm 0.31$ ) and, in fact, it increased NF- $\kappa$ B activity in the C4-2B cells ( $2.5 \pm 1.3$ ; Fig. S1D, right) and enhanced the activity of Akt in the DU-145 cells ( $1.8 \pm 0.65$ ). These data indicate that FUS enables survival and rapid recurrence of PCa cells due to the increased expression and activity of NF $\kappa$ B and Akt pro-survival signaling pathways.

# Supplementary Figures

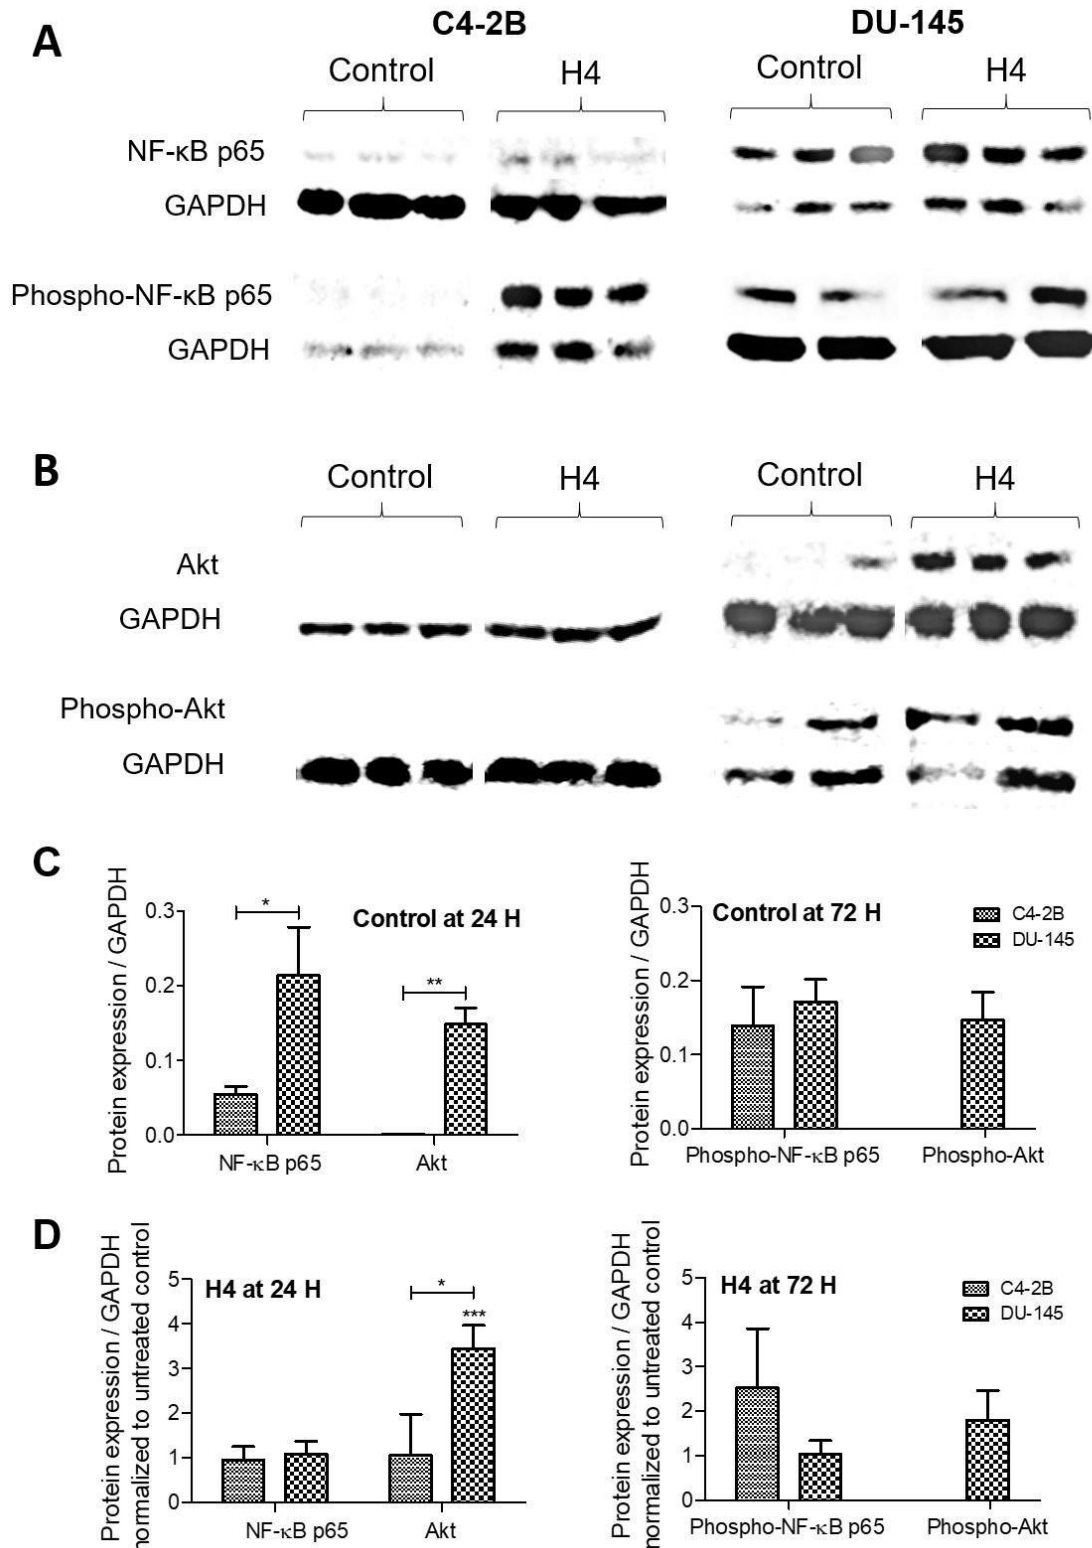

**Figure S1.** Standalone FUS at safe physiologic doses fails to downregulate the expression and activity of pro-survival markers NF- $\kappa$ B and Akt in CRPC cells. **A** and **B**, Shown are representative western blot images of the expression of total and phosphorylated NF- $\kappa$ B p65 (**A**) and Akt (**B**) in C4-2B and DU-145 cells, exposed or not to FUS at level H4. **C**, Expression of NF- $\kappa$ B p65 and Akt (left) and their phosphorylated forms (right) per GAPDH level for untreated C4-2B and DU-145 cells. **D**, Expression of NF- $\kappa$ B p65 and Akt (left) and their phosphorylated forms (right) per GAPDH and untreated control group levels for C4-2B and DU-145 cells treated by FUS at level H4. Total protein

expression data were collected at 24 h post-treatment, while phosphorylated protein expression was measured at 72 h. Values are mean  $\pm$  SEM of 3-6 independent tests. \* $p < 0.05$ . \*\* $p < 0.01$ , \*\*\* $p < 0.001$ .
